# Supplementary material for: Nuclear Translocation of LDHA Promotes the Catabolism of BCAAs to Sustain GBM Cell Proliferation through the TxN Antioxidant Pathway
Source: MDPI journal article supplement (doi:10.3390/ijms24119365), 2023-05-27
Supplement: s1 [file s1]

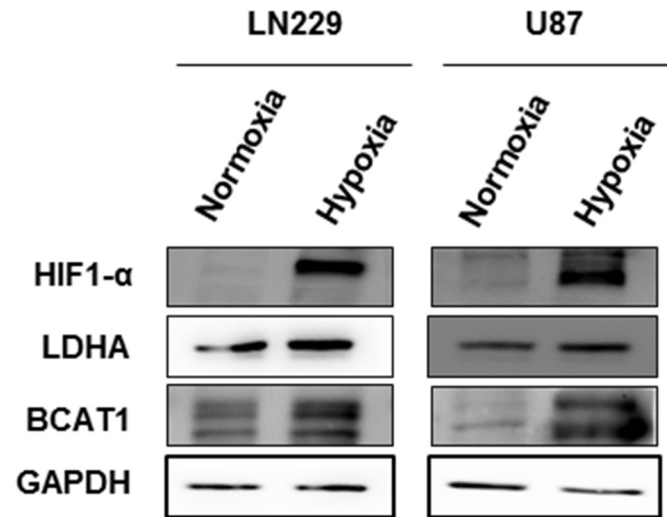

**Figure S1.** HIF-1 $\alpha$  was induced after hypoxia culture, and the expression of LDHA and BCAT1 were increased.

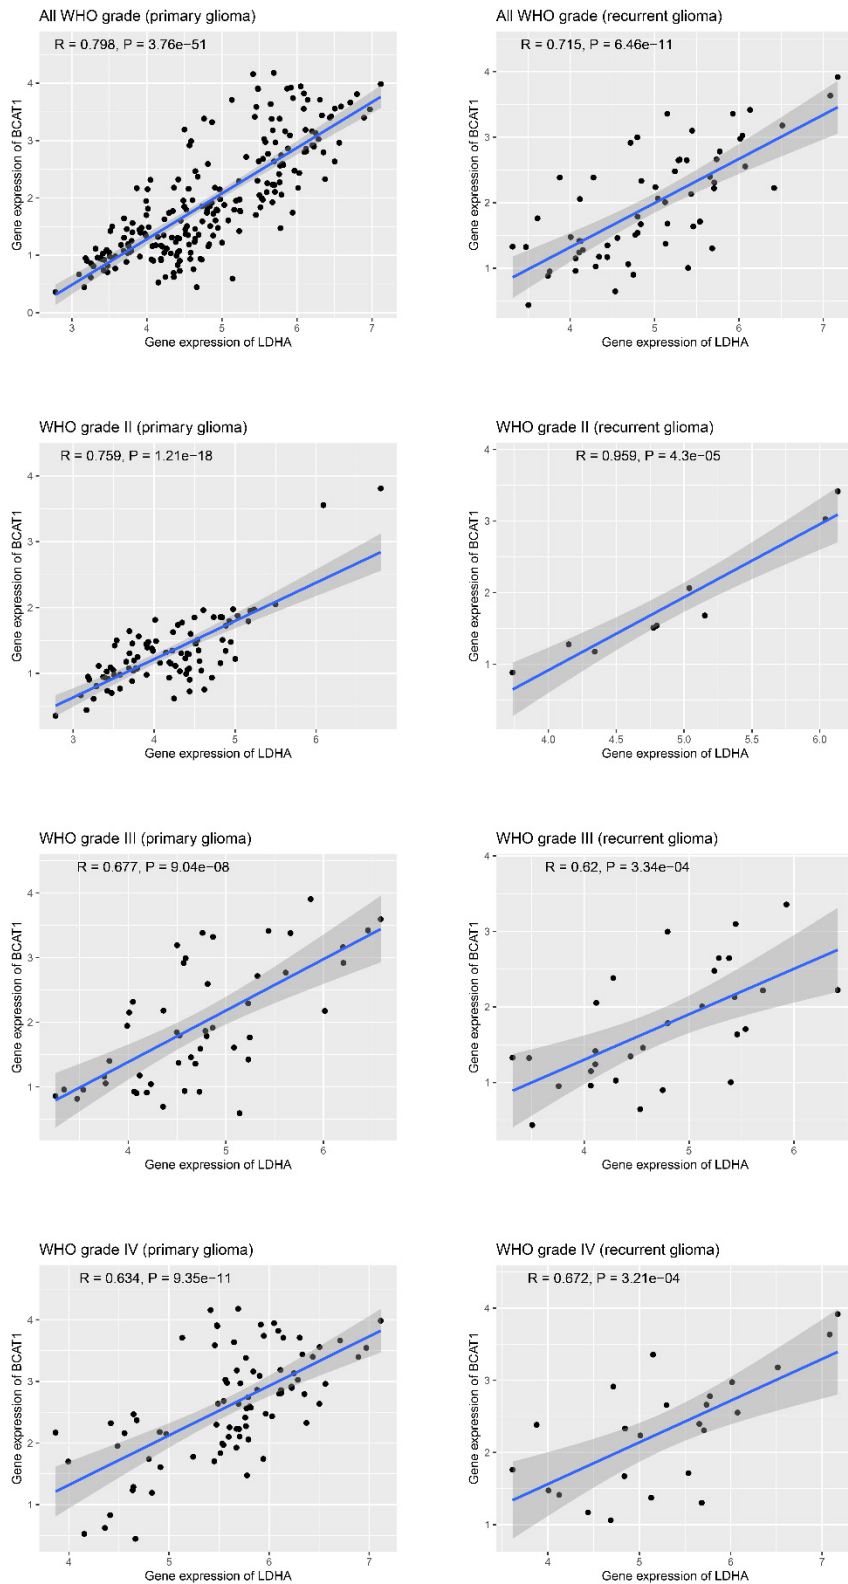

**Figure S2.** The correlation of LDHA and BCAT1 in glioma of CGGA. A significant positive correlation between LDHA and BCAT1 expression was found in both primary and recurrent gliomas, and a similar positive correlation was observed in gliomas at all malignant levels.
